# Supplementary material for: Transcriptome Analysis Reveals that Vitamin A Metabolism in the Liver Affects Feed Efficiency in Pigs
Source: PubMed Central journal article supplement (PMC5100860; doi:10.1534/g3.116.032839), 2016-09-14
Supplement: supp_g3.116.032839_TableS1.pdf [file supp_g3.116.032839_TableS1.pdf]

Table S1 PCR primers of 6 selected different expressed transcripts

| Number               | Symbol | Primer sequence 5'-3'  | Product length (bp) | T <sub>m</sub> (°C) |
|----------------------|--------|------------------------|---------------------|---------------------|
| <i>Linc-ssct5281</i> | F      | GTGGCTCTGGGATGAATGCT   | 128 bp              | 60                  |
|                      | R      | GGGGGCGTGGTAAATGAAGA   |                     |                     |
| <i>Linc-ssct3489</i> | F      | GGGGAGCAGCCAGTACAAG    | 100 bp              | 60                  |
|                      | R      | CCGTCTACGGAGGATAACTGAC |                     |                     |
| <i>SLC27A6</i>       | F      | TGGGTGCAGATTTGCTTGGA   | 227 bp              | 60                  |
|                      | R      | TGGTTTGGGGAGACCTGTTG   |                     |                     |
| <i>HSD17B2</i>       | F      | ATTCTGGGATTGGCCATGCT   | 166 bp              | 60                  |
|                      | R      | CAAGGATCCCTGCGTTGTTG   |                     |                     |
| <i>CYP11A1</i>       | F      | GTGGCTCTGGGATGAATGCT   | 198 bp              | 60                  |
|                      | R      | GGCATTCTCGTCCATCCTCT   |                     |                     |
| <i>FANS</i>          | F      | CCTGCCACAACCTCCAAAGACA | 139 bp              | 60                  |
|                      | R      | ATGAAGTAGGAGTGGAAGGCGA |                     |                     |

F, forward; R, reverse.
