# Supplementary material for: Transcriptome Analysis Reveals that Vitamin A Metabolism in the Liver Affects Feed Efficiency in Pigs
Source: PubMed Central journal article supplement (PMC5100860; doi:10.1534/g3.116.032839), 2016-09-14
Supplement: supp_g3.116.032839_TableS2.pdf [file supp_g3.116.032839_TableS2.pdf]

Table S2 Significantly enriched GO terms of different expressed genes

| ID         | Term                            | Count | %    | PValue | Genes                                                                              |
|------------|---------------------------------|-------|------|--------|------------------------------------------------------------------------------------|
| GO:0016055 | Wnt receptor signaling pathway  | 5     | 0.20 | 0.07   | TCF7L2, UBE2B, NXN, NLK, PYGO1                                                     |
| GO:0045445 | myoblast differentiation        | 3     | 0.12 | 0.02   | TCF7L2, CSRP2, LGALS1                                                              |
| GO:0030036 | actin cytoskeleton organization | 7     | 0.28 | 0.05   | RACGAP1, ANTXR1, PDLIM3, EVL, TMSB4X, XIRP2, ACTA1                                 |
| GO:0030029 | actin filament-based process    | 9     | 0.36 | 0.01   | RACGAP1, ANTXR1, PDLIM3, EVL, TMSB4X, XIRP2, ACTA1, VIL1, MYH7                     |
| GO:0007010 | cytoskeleton organization       | 12    | 0.48 | 0.01   | RACGAP1, UBE2B, ANTXR1, PDLIM3, EVL, TMSB4X, XIRP2, ACTA1, CETN2, VIL1, KRT8, ANK3 |
| GO:0007017 | microtubule-based process       | 7     | 0.28 | 0.07   | UBE2B, KIF1A, KIF4A, CETN2, KIF22, KIF20A, TUBA1A                                  |

|            |                                                                       |   |      |      |                                                       |
|------------|-----------------------------------------------------------------------|---|------|------|-------------------------------------------------------|
| GO:0016568 | chromatin modification                                                | 8 | 0.32 | 0.04 | UBE2B, RBBP4, EYA3, ARID1A, DPF3, HDAC11, CHD6, SETD7 |
| GO:0043589 | skin morphogenesis                                                    | 2 | 0.08 | 0.05 | COL1A2, COL1A1                                        |
| GO:0043588 | skin development                                                      | 3 | 0.12 | 0.04 | COL1A2, COL1A1, LTB                                   |
| GO:0008089 | anterograde axon cargo transport                                      | 2 | 0.08 | 0.07 | KIF1A, KIF4A                                          |
| GO:0007018 | microtubule-based movement                                            | 5 | 0.20 | 0.04 | KIF1A, KIF4A, KIF22, KIF20A, TUBA1A                   |
| GO:0006414 | translational elongation                                              | 5 | 0.20 | 0.03 | RPL18, RPL22, RPLP1, RPL9, RPSA                       |
| GO:0006412 | translation                                                           | 8 | 0.32 | 0.09 | RPL18, RPL22, RPLP1, RPL9, RPSA, MRPL51, RARS2, NACA  |
| GO:0006959 | activation of plasma proteins involved in acute inflammatory response | 3 | 0.16 | 0.06 | SERPING1, CD46, BST2, IL7                             |
| GO:0002541 | blood circulation                                                     | 6 | 0.12 | 0.09 | SERPING1, F3, CD46                                    |
| GO:0003013 | blood coagulation                                                     | 6 | 0.24 | 0.06 | SERPING1, F5, COL1A2, MEOX2, ACTG2, HBB               |
| GO:0008015 | circulatory system process                                            | 6 | 0.24 | 0.06 | SERPING1, F5, COL1A2, MEOX2, ACTG2, HBB               |
| GO:0042060 | coagulation                                                           | 6 | 0.32 | 0.01 | SERPING1, F5, F3, VWF, PROCR, FGF2, SAA1, ENO3        |
| GO:0007596 | hemostasis                                                            | 6 | 0.24 | 0.01 | SERPING1, F5, F3, VWF, PROCR, SAA1                    |
| GO:0007599 | humoral immune response                                               | 4 | 0.24 | 0.01 | SERPING1, F5, F3, VWF, PROCR, SAA1                    |
| GO:0050878 | regulation of body fluid levels                                       | 6 | 0.24 | 0.02 | SERPING1, F5, F3, VWF, PROCR, SAA1                    |
| GO:0050817 | wound healing                                                         | 8 | 0.24 | 0.01 | SERPING1, F5, F3,                                     |

---

|            |                                          |   |      |      |                                                                 |
|------------|------------------------------------------|---|------|------|-----------------------------------------------------------------|
| GO:0006631 | fatty acid metabolic process             | 6 | 0.24 | 0.08 | VWF, PROCR, SAA1<br>CYP2J2, SCD, FASN, SLC27A6, ANKRD23, ELOVL2 |
| GO:0042905 | 9-cis-retinoic acid metabolic process    | 2 | 0.08 | 0.05 | CYP1A1, ALDH1A2                                                 |
| GO:0042904 | 9-cis-retinoic acid biosynthetic process | 2 | 0.08 | 0.05 | CYP1A1, ALDH1A2                                                 |
| GO:0035238 | vitamin A biosynthetic process           | 2 | 0.08 | 0.05 | CYP1A1, ALDH1A2                                                 |
| GO:0042362 | fat-soluble vitamin biosynthetic process | 2 | 0.08 | 0.06 | CYP1A1, ALDH1A2                                                 |
| GO:0033189 | response to vitamin A                    | 3 | 0.12 | 0.08 | CYP1A1, ALDH1A2, HSD17B2                                        |
| GO:0048565 | gut development                          | 3 | 0.12 | 0.06 | CYP1A1, ALDH1A2, TCF7L2                                         |
| GO:0006805 | xenobiotic metabolic process             | 3 | 0.12 | 0.02 | CYP1A1, UGT2B4, NQO1                                            |
| GO:0009410 | response to xenobiotic stimulus          | 3 | 0.12 | 0.03 | CYP1A1, UGT2B4, NQO1                                            |
| GO:0034754 | pancreas development                     | 3 | 0.16 | 0.03 | CYP1A1, ALDH1A2, UGT2B4, FGF2                                   |
| GO:0001889 | cellular hormone metabolic process       | 4 | 0.16 | 0.02 | CYP1A1, ALDH1A2, VWF, ONECUT2                                   |
| GO:0042445 | liver development                        | 4 | 0.20 | 0.03 | CYP1A1, ALDH1A2, UGT2B4, FGF2, SULT1B1                          |
| GO:0010817 | hormone metabolic process                | 5 | 0.20 | 0.10 | CYP1A1, ALDH1A2, UGT2B4, FGF2, SULT1B1                          |
| GO:0008202 | regulation of hormone levels             | 5 | 0.28 | 0.03 | CYP1A1, UGT2B4, FGF2, HSD17B2, SULT1B1, TSPO, NR5A2             |
| GO:0008283 | steroid metabolic process                | 7 | 0.48 | 0.01 | CYP1A1, TCF7L2, RACGAP1, CSRP2, TSPO, BST2,                     |

---

---

|            |                     |    |      |      |                                                                                                                                                                            |
|------------|---------------------|----|------|------|----------------------------------------------------------------------------------------------------------------------------------------------------------------------------|
| GO:0055114 | cell proliferation  | 12 | 0.60 | 0.02 | LAMP3, PA2G4,<br>CDK9, DLGAP5,<br>LGR4, PRG4<br>CYP1A1,<br>ALDH1A2, F5,<br>HSD17B2, NQO1,<br>CYP2J2, SCD,<br>NXN, FASN,<br>GLYR1, ERO1LB,<br>KCNAB1, ADI1,<br>RDH16, DHODH |
| GO:0031016 | oxidation reduction | 15 | 0.12 | 0.06 | ALDH1A2,<br>TCF7L2,<br>ONECUT2                                                                                                                                             |

---
